# Supplementary material
Source: PubMed Central journal article supplement (PMC2664998)
Supplement: NIHMS91978-supplement-Supplementary.pdf [file NIHMS91978-supplement-Supplementary.pdf]

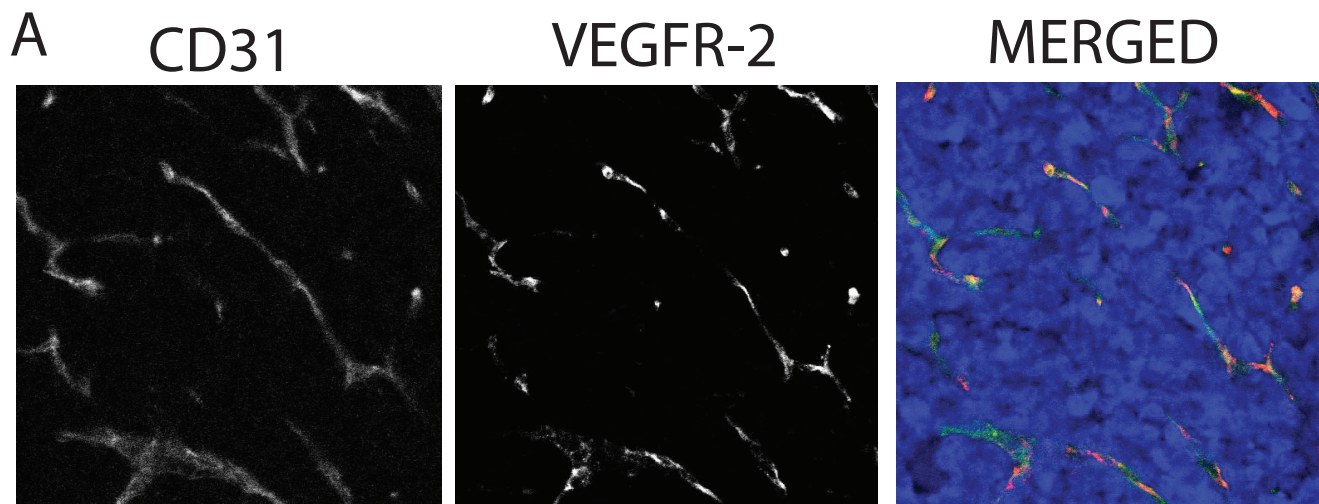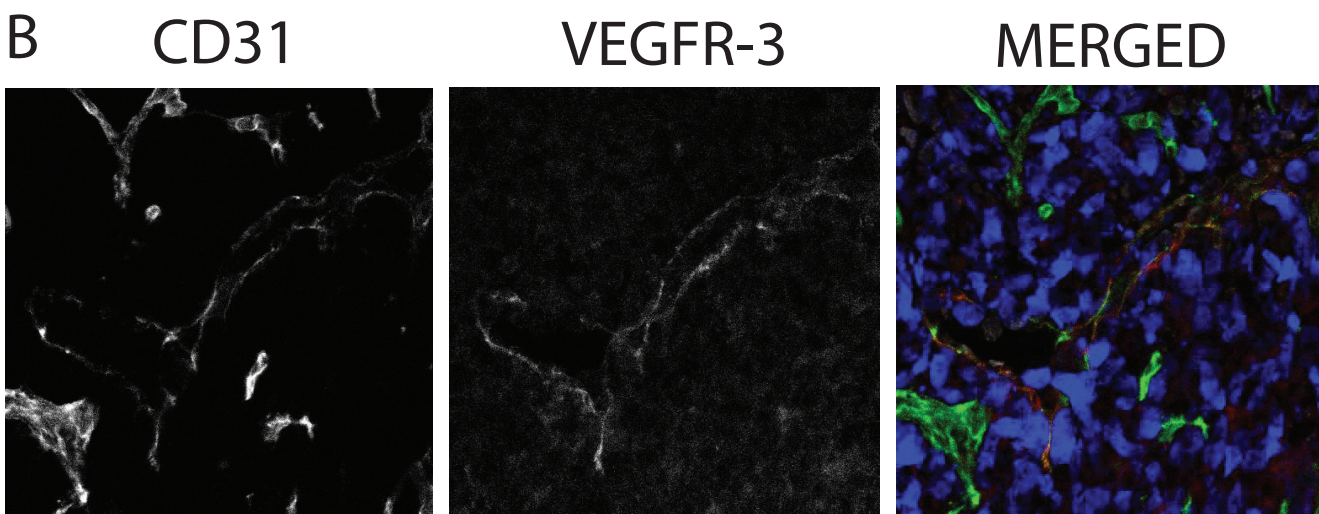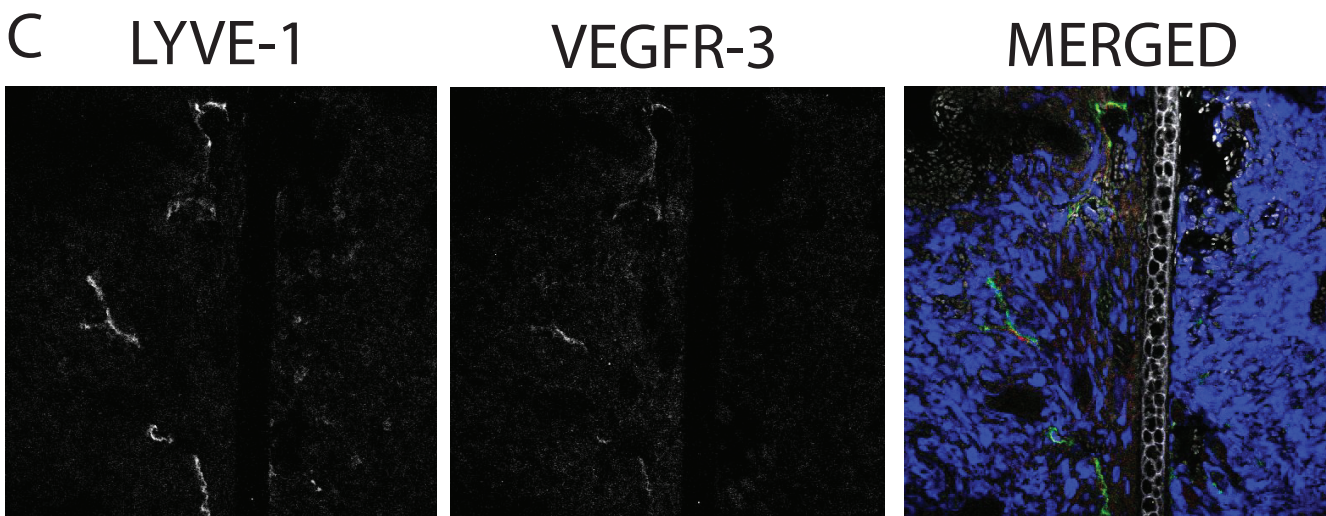

**Supplementary Figure 1:** Blue is GFP signal of tumor cells.  
A, B) Image width = 210 microns, C) Image width = 630 microns.

# Supplementary Figure 2A

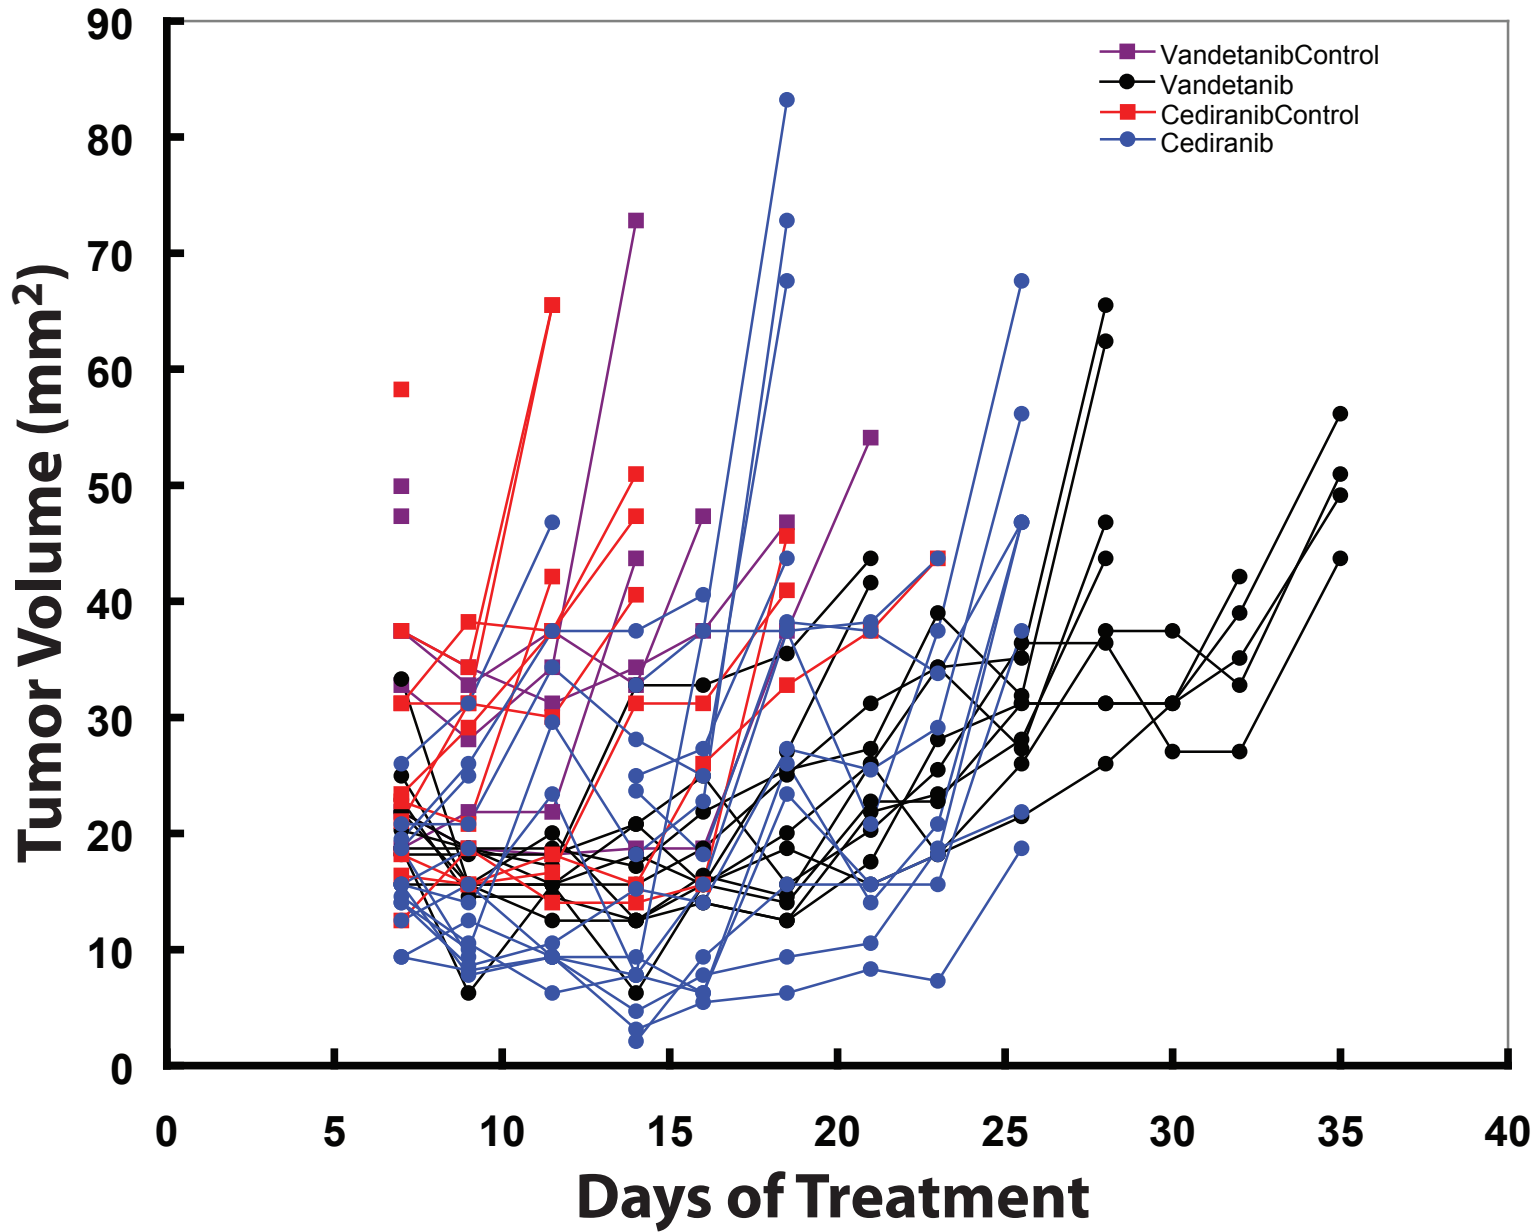

**Supplementary  
Figure 2B**

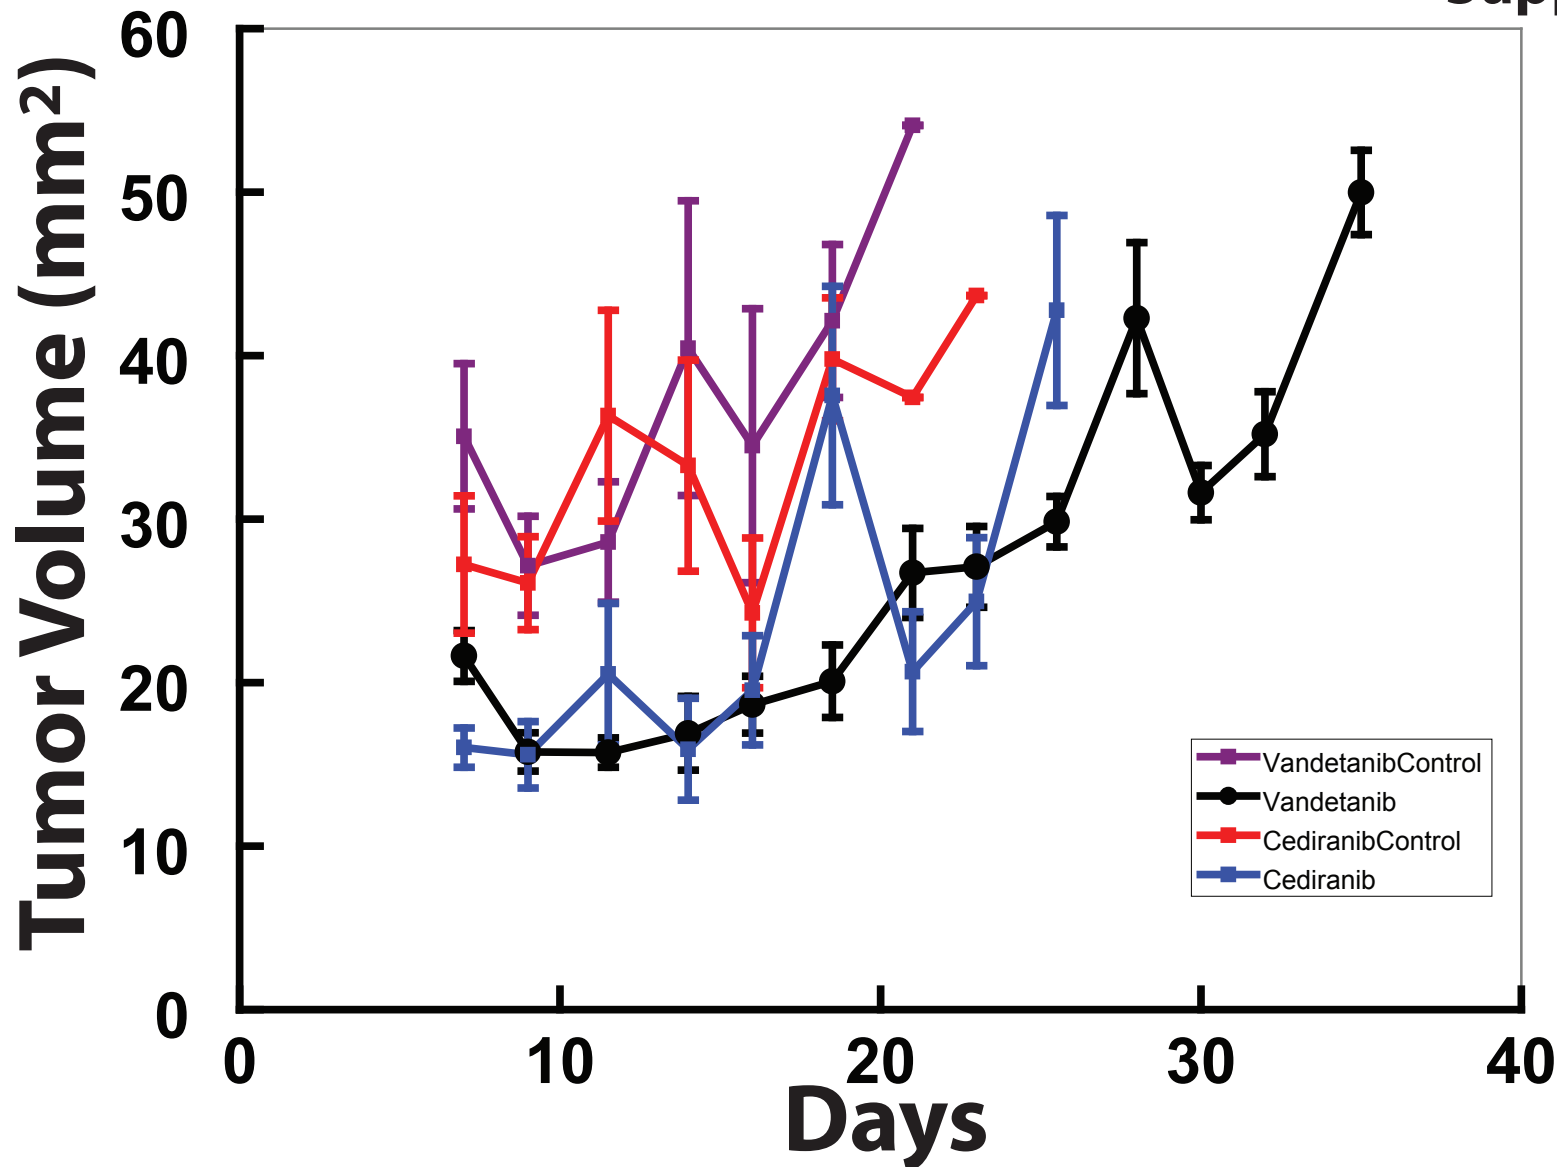

| Days              | 7  | 9  | 11.5 | 14 | 16 | 18.5 | 21 | 23 | 25.5 | 28 | 30 | 32 | 35 |
|-------------------|----|----|------|----|----|------|----|----|------|----|----|----|----|
| VandetanibControl | 7  | 5  | 5    | 5  | 3  | 2    | 1  | 0  | 0    | 0  | 0  | 0  | 0  |
| Vandetanib        | 10 | 10 | 11   | 10 | 11 | 11   | 11 | 9  | 9    | 9  | 5  | 5  | 4  |
| CediranibControl  | 10 | 9  | 9    | 6  | 3  | 3    | 1  | 1  | 0    | 0  | 0  | 0  | 0  |
| Cediranib         | 14 | 14 | 11   | 14 | 14 | 13   | 9  | 9  | 8    | 0  | 0  | 0  | 0  |

} # of animals per group  
at each time point
